# Supplementary material for: Improved supercapacitor performances by adding carbonized C60-based nanospheres to PVA/TEMPO-cellulose hydrogel-based electrolyte
Source: Royal Society of Chemistry journal article supplement (doi:10.1039/d3ra03349j), 2023-01-01
Supplement: d3ra03349j1.pdf [file d3ra03349j1.pdf]

## Electronic Supplementary Information

### Improved supercapacitor performances by adding carbonized C<sub>60</sub>-based nanospheres to PVA/TEMPO-cellulose hydrogel-based electrolyte

Han Jia,<sup>a</sup> Sabina Shahi,<sup>b</sup> Lok Kumar Shrestha,<sup>c,d,\*</sup> Katsuhiko Ariga,<sup>c,e</sup> and Tsuyoshi Michinobu<sup>a,\*</sup>

<sup>a</sup> Department of Materials Science and Engineering, Tokyo Institute of Technology, 2-12-1 Ookayama, Meguro-ku, Tokyo 152-8552, Japan. E-mail: michinobu.t.aa@m.titech.ac.jp

<sup>b</sup> Central Department of Chemistry, Tribhuvan University, Kirtipur, Kathmandu 44613, Nepal

<sup>c</sup> Research Center for Materials Nanoarchitectonics (MANA), National Institute for Materials Science (NIMS), 1-1 Namiki, Tsukuba 305-0044, Japan. E-mail: SHRESTHA.Lokkumar@nims.go.jp

<sup>d</sup> Department of Materials Science, Faculty of Pure and Applied Sciences, University of Tsukuba, 1-1-1 Tennodai, Tsukuba 305-8573, Japan

<sup>e</sup> Department of Advanced Materials Science, Graduate School of Frontier Sciences, The University of Tokyo, 5-1-5 Kashiwanoha, Kashiwa 277-8561, Japan

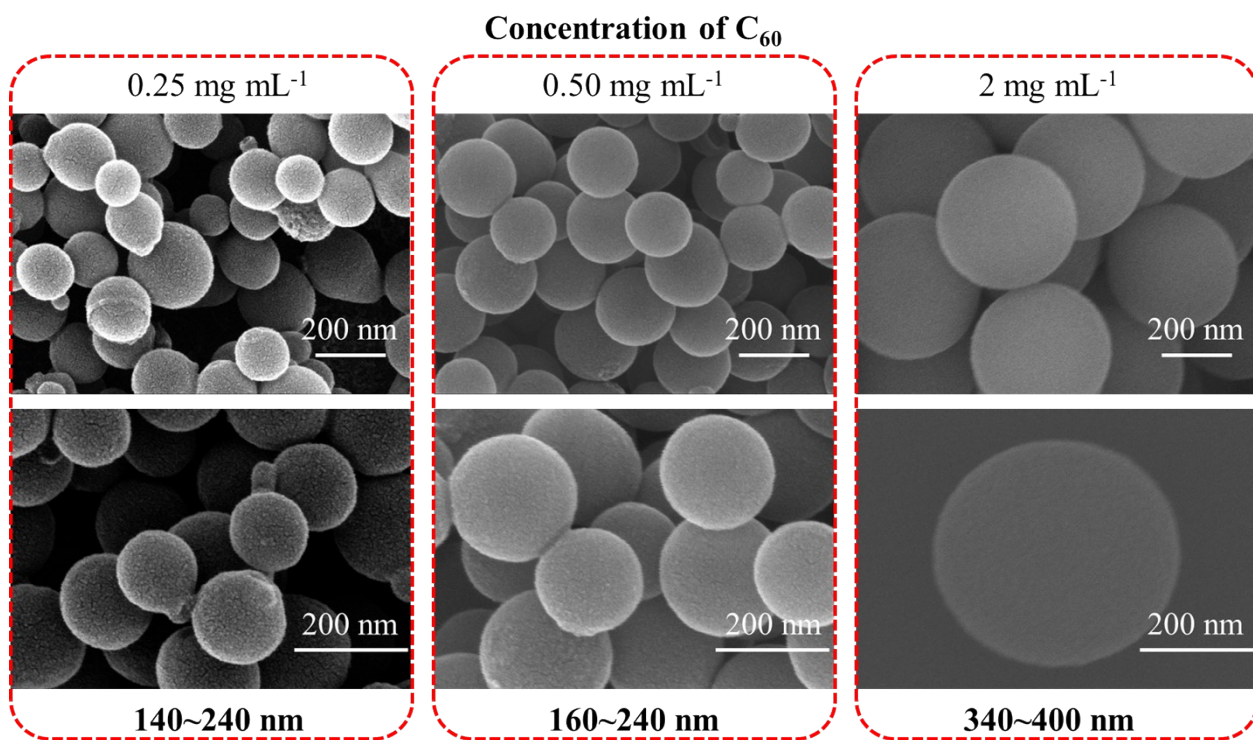

**Fig. S1.** SEM images of C<sub>60</sub>-based nanospheres fabricated with different C<sub>60</sub> concentrations.

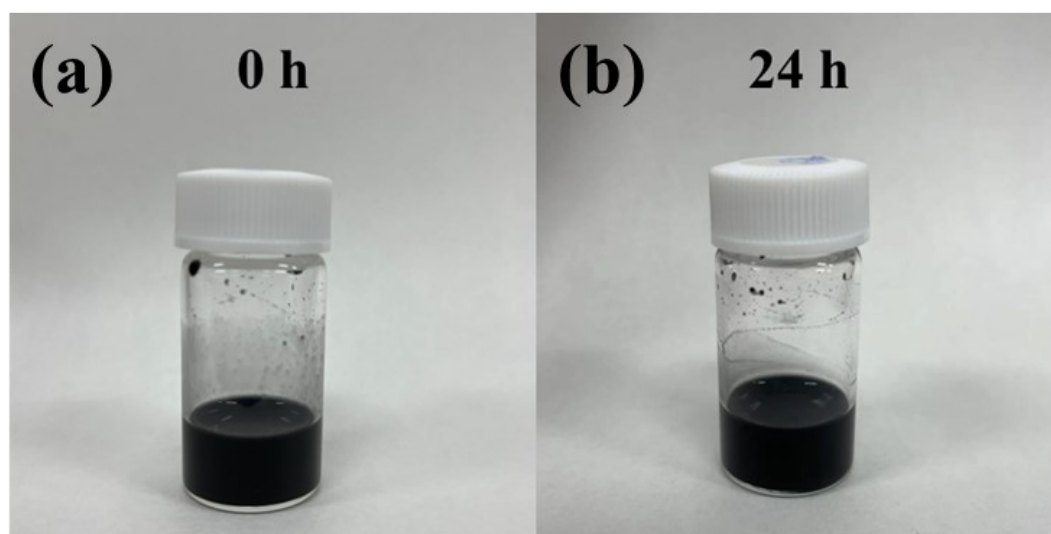

**Fig. S2.** Photos of TCCS aqueous suspension after (a) 0 h and (b) 24 h of storage.

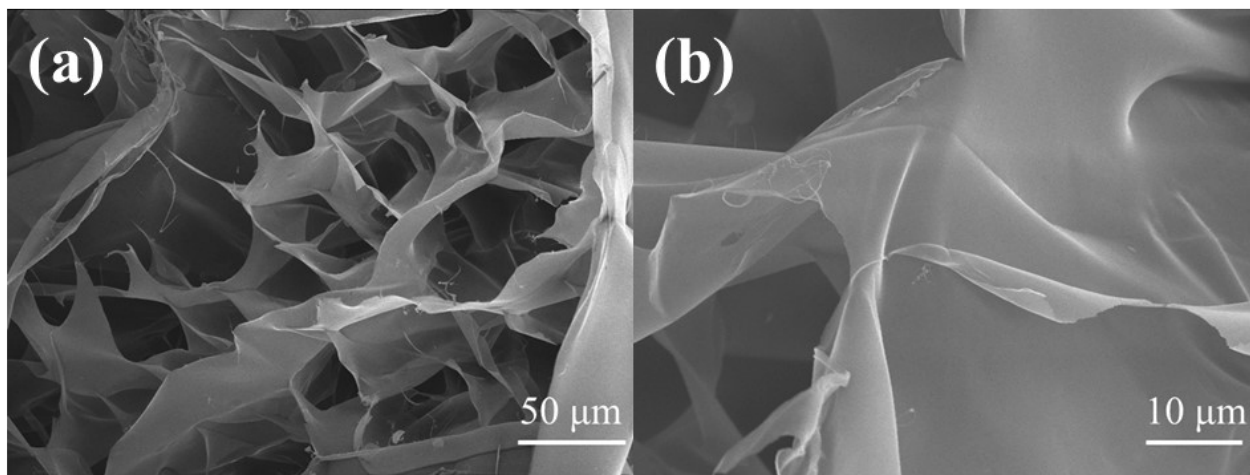

**Fig. S3.** SEM images of the porous structure of freeze-dried TC films. The image (b) is a magnified one of the image (a).

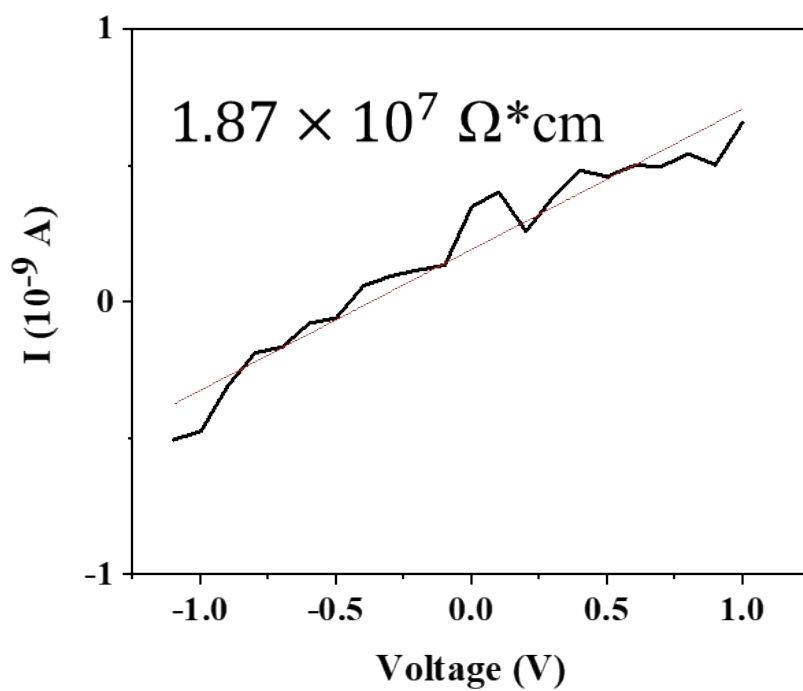

**Fig. S4.** The I-V curve of a freeze-dried TCCS film at a voltage of -1 V to 1 V. The red line is the fitted curve. The sample size was 0.8 cm × 0.1 cm × 0.03 cm (length × width × thickness).

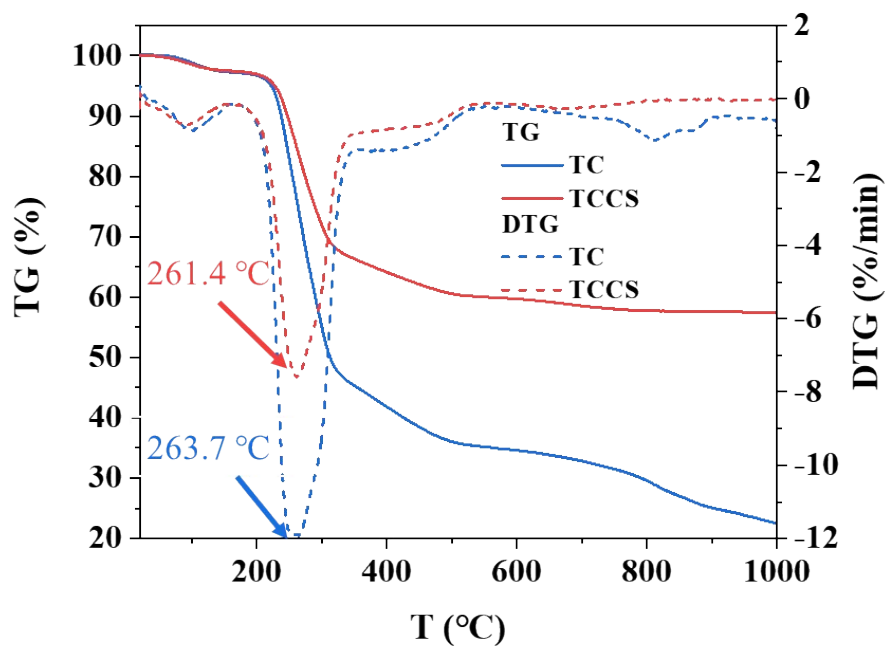

**Fig. S5.** TGA and DTG curves of freeze-dried TC and TCCS films from 20 to 1000 °C.

**Table S1.** Decomposition temperature ( $T_d$ ) and residual amount after TGA measurements of the freeze-dried TC and TCCS films

| Sample | $T_d$ (90%) (°C) | Residual amount (%) |
|--------|------------------|---------------------|
| TC     | 237              | 22                  |
| TCCS   | 247              | 57                  |

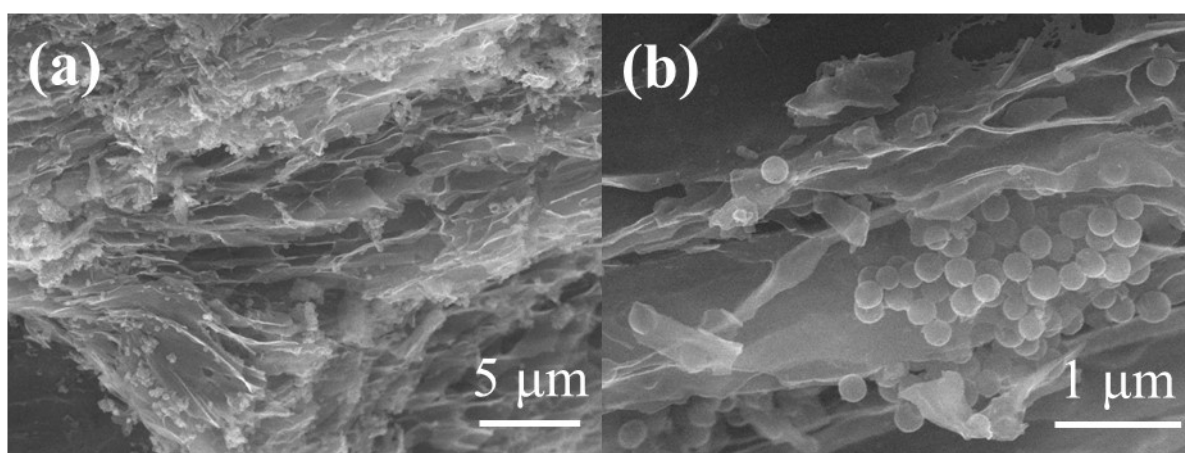

**Fig. S6.** SEM images of TCCS films after TGA measurements. The image (b) is a magnified one of the image (a).

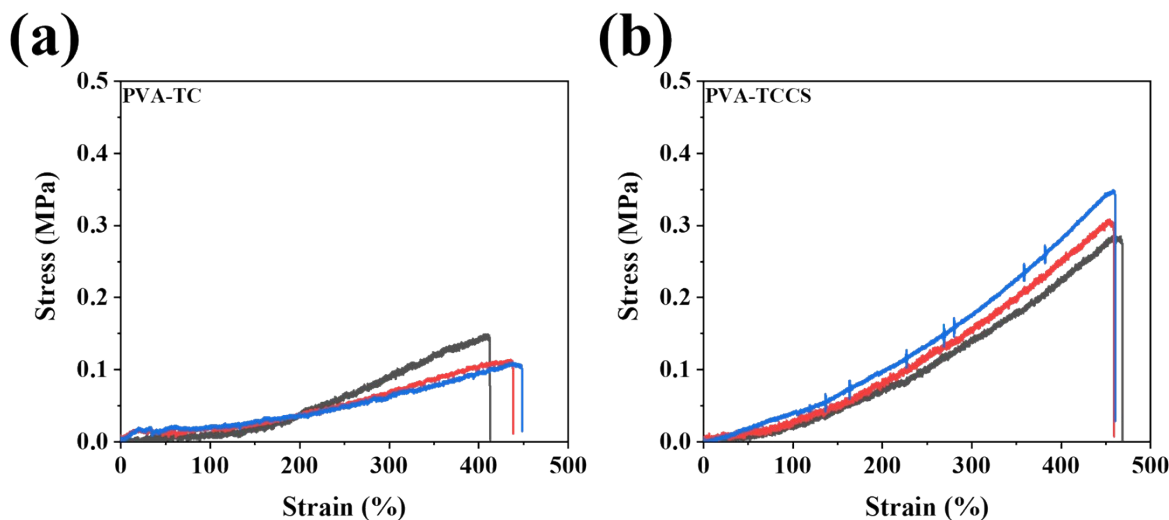

**Fig. S7.** Strain-stress curves of (a) PVA-TC and (b) PVA-TCCS hydrogels.

The hydrogels were sandwiched and sealed between two stainless steel discs for the measurement. The ionic conductivities ( $\sigma$ ) of organogels were calculated according to the following equation:

$$\sigma = \frac{L}{RA} \quad (S1)$$

where  $L$  represents the thickness of the hydrogel,  $R$  represents the impedance value obtained by the intercepts of EIS curves with the x-axis, and  $A$  represents the contact area of the organogel between two stainless steel electrodes.

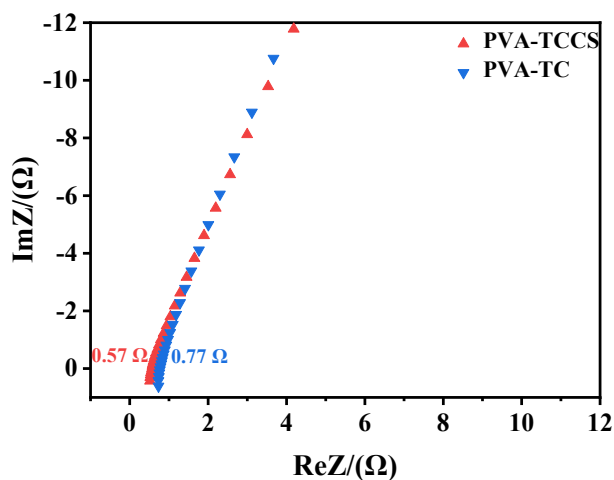

**Fig. S8.** The EIS plots of PVA-TC hydrogel and PVA-TCCS hydrogel after the solvent exchange with 1 M  $H_2SO_4$  aqueous solution measured at a frequency range from  $5 \times 10^5$  to  $10^{-1}$  Hz and 10 mV voltage.

**Table S2.** Area, thickness, and ionic conductivity of the hydrogels measured by EIS.

| Sample   | Area<br>(cm <sup>2</sup> ) | Thickness<br>(cm) | Ionic conductivity<br>(S cm <sup>-1</sup> ) |
|----------|----------------------------|-------------------|---------------------------------------------|
| PVA-TC   | 1                          | 0.10              | 0.17                                        |
| PVA-TCCS | 1                          | 0.07              | 0.09                                        |

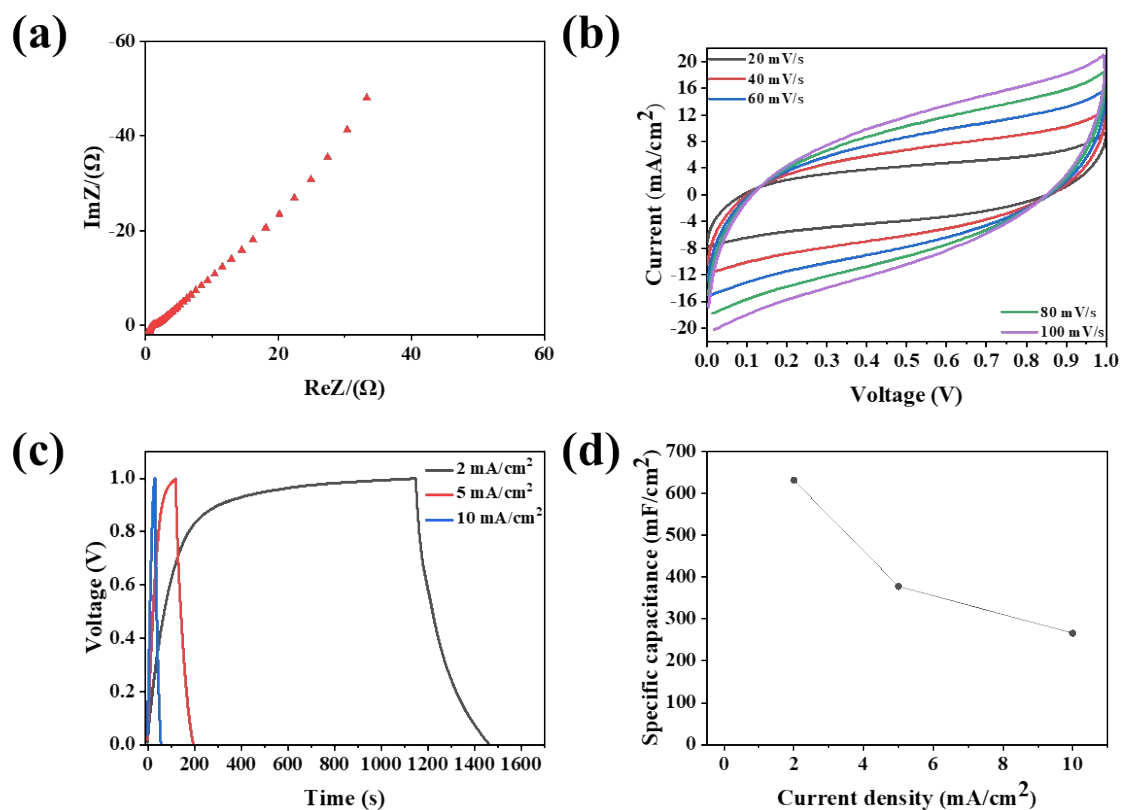

**Fig. S9.** (a) The Nyquist plots for the electrode. (b) CV curves vs. scan rate for the electrode. (c) GCD profiles vs. current density for the electrode. (d) Specific capacitance as a function of the current density of the electrode.

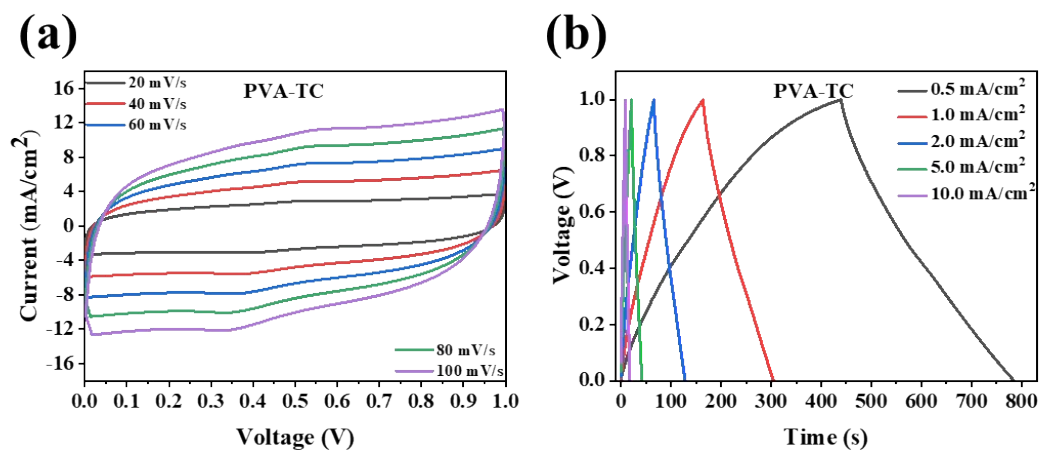

**Fig. S10.** (a) CV profiles of the PVA-TC system at different scan rates and (b) the corresponding CD profiles at different currents.
